# Supplementary material
Source: publisher figshare collection journal article supplement (https://frontiersin.figshare.com/ndownloader/files/29023860)
Supplement: Supplementary file 1 [file 29023860]

## Sheet: Hoja1
Exposure parameters							Score	Maximum score value
Population density [inhab/km2]	Population within 5 km radius from the main crater or if volcanic field within the field. If density >0=1; >1=2; >10=3; >100=4							4
	Population within 10 km radius from the main crater, or in a buffer of 5 km from the field border if volcanic field. If density >0=1; >1=2; >10=3; >100=4							4
	Population within 30 km radius from the main crater, or in a buffer of 10 km from the field border if volcanic field. If density >0=1; >1=2; >10=3; >100=4							4
	Population within 100 km radius from the main crater, or in a buffer of 30 km from the field border if volcanic field. If density >0=1; >1=2; >10=3; >100=4							4
Residential buildings	If first appearance in 5 km radius from the main crater						4	4
	If first appearance in 10 km radius from the main crater						3
	If first appearance in 30 km radius from the main crater						2
	If first appearance in 100 km radius from the main crater						1
	If volcanic field, residential buildings within the field=4 or first appearance in a buffer from the field border of 5 km=3, 10 km=2, 30 km=1
Transportation: Airports, air route, train stations, rails, highways, national ways, harbors	If first appearance in 5 km radius from the main crater						4	4
	If first appearance in 10 km radius from the main crater						3
	If first appearance in 30 km radius from the main crater						2
	If first appearance in 100 km radius from the main crater						1
	If volcanic field, transportation infrastructure within the field=4 or first appearance in a buffer from the field border of 5 km=3, 10 km=2, 30 km=1
Power infrastructure: Power plants, transmission lines electricity, gas, oil	If first appearance in 5 km radius from the main crater						4	4
	If first appearance in 10 km radius from the main crater						3
	If first appearance in 30 km radius from the main crater						2
	If first appearance in 100 km radius from the main crater						1
	If volcanic field, power infrastructure within the field=4 or first appearance in a buffer from the field border of 5 km=3, 10 km=2, 30 km=1
Water infrastructure: Dams, tanks, waterways	If first appearance in 5 km radius from the main crater						4	4
	If first appearance in 10 km radius from the main crater						3
	If first appearance in 30 km radius from the main crater						2
	If first appearance in 100 km radius from the main crater						1
	If volcanic field, water infrastructure within the field=4 or first appearance in a buffer from the field border of 5 km=3, 10 km=2, 30 km=1
Telecommunication infrastructure: Radio, tv, telephone, internet antennas, lines	If first appearance in 5 km radius from the main crater						4	4
	If first appearance in 10 km radius from the main crater						3
	If first appearance in 30 km radius from the main crater						2
	If first appearance in 100 km radius from the main crater						1
	If volcanic field, telecommunication infrastructure within the field=4 or first appearance in a buffer from the field border of 5 km=3, 10 km=2, 30 km=1
Emergency facilities: Civil protection installations, police stations, fire stations, hospitals, army	If first appearance in 5 km radius from the main crater						4	4
	If first appearance in 10 km radius from the main crater						3
	If first appearance in 30 km radius from the main crater						2
	If first appearance in 100 km radius from the main crater						1
	If volcanic field, emergency facilities within the field=4 or first appearance in a buffer from the field border of 5 km=3, 10 km=2, 30 km=1
Critical facilities: Government offices, schools, recreation facilities.	If first appearance in 5 km radius from the main crater						4	4
	If first appearance in 10 km radius from the main crater						3
	If first appearance in 30 km radius from the main crater						2
	If first appearance in 100 km radius from the main crater						1
	If volcanic field, critical facilities within the field=4 or first appearance in a buffer from the field border of 5 km=3, 10 km=2, 30 km=1
Presence of at least one economic activity (agriculture, livestock, forestry, fishing, mining, industry, tourism).	If first appearance in 5 km radius from the main crater						4	4
	If first appearance in 10 km radius from the main crater						3
	If first appearance in 30 km radius from the main crater						2
	If first appearance in 100 km radius from the main crater						1
	If volcanic field, presence of at least one economic activity within the field=4 or first appearance in a buffer from the field border of 5 km=3, 10 km=2, 30 km=1
Total exposure score							E=	48
